# Supplementary material for: Exercise Intervention for Bone Metastasis: Safety, Efficacy and Method of Delivery
Source: MDPI journal article supplement (doi:10.3390/cancers15061786), 2023-03-15
Supplement: s1 [file s1]

| Study type   | Recruitment Period | Population           | Type of cancer                                            | Stage of cancer                      | Aim of the study                                                                                                                                                                                     | Overview of methods                                    | Type of exercise                                                        | Duration of exercise                                                                 | Other adjunct therapies                                                       | Reference |
|--------------|--------------------|----------------------|-----------------------------------------------------------|--------------------------------------|------------------------------------------------------------------------------------------------------------------------------------------------------------------------------------------------------|--------------------------------------------------------|-------------------------------------------------------------------------|--------------------------------------------------------------------------------------|-------------------------------------------------------------------------------|-----------|
| experimental | 4 weeks            | 32 males             | Prostate                                                  | metastatised                         | Assess feasibility of exercise for patients with metastatic cancer                                                                                                                                   | intervention                                           | aerobic and resistance                                                  | 12 week                                                                              | androgen deprivation therapy ADT                                              | [9]       |
| experimental | 25 months          | 66 males and females | breast, lung, colorectal, prostate, gynecologic, lymphoma | advanced with 16 has bone metastasis | To compare the effects of resistance and cardiovascular exercise on functional mobility in individuals with advanced cancer.                                                                         | Prospective, 2-group pre-test-posttest pilot           | resistance, cardiovascular,                                             | 10 weeks of individualised exercise                                                  | chemotherapy, radiation                                                       | [10]      |
| experimental | 12 months          | 20 males             | Prostate                                                  | metastasis                           | feasibility trial was to determine the safety and efficacy of resistance exercise by prostate cancer survivors with bone metastatic disease.                                                         | intervention, two armed prospective controlled trial   | resistance exercise                                                     | twice weekly for 12 weeks                                                            | androgen deprivation therapy ADT, radiation                                   | [11]      |
| experimental | 9 months           | 14 females           | breast                                                    | metastasis                           | determine the safety and feasibility of a physical activity program for women with metastatic breast cancer ; explore the efficacy of the program.                                                   | pilot randomized controlled trial                      | resistance exercise & brisk walking                                     | 8 weeks, 10-15 mins brisk walk followed by 30-40 mins of resistance training         | hormone therapy, chemotherapy                                                 | [12]      |
| experimental | 6 months           | 60 males and females | lung, breast, prostate, melanoma, kidney, others          | metastasis                           | Compare the effects of RT versus passive physical therapy on QoL, fatigue, and emotional distress outcomes during radiation therapy in patients with spinal bone metastases under radiotherapy (RT). | randomised, controlled, explorative intervention trial | resistance training vs physical therapy (in form of breathing exercise) | resistance training 30 mins; physical therapy 15 mins; three times/week for 6 months | hormone therapy, chemotherapy, immunotherapy,                                 | [33]      |
| experimental | 6 months           | 60 males and females | lung, breast, prostate, melanoma, kidney, others          | metastasis                           | To compare the effects of RT versus passive physical therapy on bone density during radiation therapy (RT) in patients with spinal bone metastases. To quantify pathological fractures               | randomised, controlled, explorative intervention trial | resistance training vs passive physical therapy                         | 6 months, resistance training 30 mins, passive physical therapy 15 mins.             | hormone therapy, immunotherapy, chemotherapy, radiotherapy, orthopedic corset | [33]      |
|              |                    |                      |                                                           |                                      | to explore whether patients with                                                                                                                                                                     |                                                        |                                                                         | 6 months, treated                                                                    |                                                                               |           |

|              |               |                      |                                |                                                 |                                                                                                                                                                                                                                            |                                                     |                                                                                                                                                                                                                                                                       |                                                                                                                         |                                                |      |
|--------------|---------------|----------------------|--------------------------------|-------------------------------------------------|--------------------------------------------------------------------------------------------------------------------------------------------------------------------------------------------------------------------------------------------|-----------------------------------------------------|-----------------------------------------------------------------------------------------------------------------------------------------------------------------------------------------------------------------------------------------------------------------------|-------------------------------------------------------------------------------------------------------------------------|------------------------------------------------|------|
| experimental | 21 months     | 214 males            | prostate                       | prostate cancer including bone metastasis (21%) | accepted exercise in a local football club under regular conditions, and to examine the potential effects of 1 year of community based football training in terms of both randomised participants and just those adhering to the protocol. | 2 armed, multicentre randomised controlled trial    | playing football                                                                                                                                                                                                                                                      | group - twice a week for an hour; control group 15-30 min phone session re options for physical activity and free rehab | radiation, chemotherapy, anti-androgen therapy | [13] |
| experimental | not mentioned | 60 males and females | lung, breast, prostate, others | spinal metastasis                               | to investigate the feasibility of free isometric spinal stabilization exercises concomitant to palliative-analgetic radiotherapy in patients with unstable spinal metastases                                                               | exploratory randomized controlled feasibility trial | free spinal stabilization exercise on the day of radiotherapy (2 weeks) and then home-based for 3 months; CT - progressive muscle relaxation exercise daily on 9+-2 days with radiotherapy : read or played from recordings 15mins a day on upper and lower extremity | 3 months                                                                                                                | medication, radiation                          | [14] |
| experimental | 36 months     | 57 males             | Prostate                       | bone metastasis                                 | Test the efficacy and safety of a modular multimodal exercise program (M3EP) comprising resistance, aerobic, and flexibility                                                                                                               | two armed prospective randomized controlled trial   | M3EP: resistance, aerobic, flexibility exercises, 3 times/week                                                                                                                                                                                                        | 3 months                                                                                                                | ADT, radiation, brachytherapy, chemotherapy    | [15] |

|              |                      |                    |                      |                                                                                                                                                                                     |                                   |                                                                                                                                                                                                                                   |          |                                                |
|--------------|----------------------|--------------------|----------------------|-------------------------------------------------------------------------------------------------------------------------------------------------------------------------------------|-----------------------------------|-----------------------------------------------------------------------------------------------------------------------------------------------------------------------------------------------------------------------------------|----------|------------------------------------------------|
|              |                      |                    |                      | training to maintain or enhance physical function                                                                                                                                   |                                   | ek, 60mins a session                                                                                                                                                                                                              |          |                                                |
| experimental | 24 males and females | MM                 | MM with bone lesions | to test the suitability of home-based exercise therapy for patients undergoing high-dose chemotherapy and autologous peripheral stem cell transplantation.                          | feasibility/pilot study           | aerobic component (usually walking, but sometimes running or cycling depending on fitness and desires of patients) and strength resistance training (using exercise stretch bands)                                                | 6 months | [16]                                           |
| experimental | 20 males and females | Breast or prostate | bone metastasis      | determine whether a 3-month supervised resistance exercise program results in any sustained functional benefits in prostate and breast cancer patients with bone metastatic disease | pilot randomized controlled trial | twice weekly resistance exercise sessions, 60 mins/session ; participants were encouraged to undertake home-based aerobic exercise sessions of walking and/or stationary cycling, with the aim of accumulating a total of 150 min | 3 months | hormone, radiation, chemotherapy, surgery [17] |

|              |           |                      |                                |                                                         |                                                                                                                                                      |                                                             |                                                                                                       |                |                                                         |      |
|--------------|-----------|----------------------|--------------------------------|---------------------------------------------------------|------------------------------------------------------------------------------------------------------------------------------------------------------|-------------------------------------------------------------|-------------------------------------------------------------------------------------------------------|----------------|---------------------------------------------------------|------|
|              |           |                      |                                |                                                         |                                                                                                                                                      |                                                             | of moderate intensity aerobic exercise each week                                                      |                |                                                         |      |
| experimental |           | 1 female             | breast                         | bone metastasis                                         | determine the feasibility and effects of an aerobic exercise program for patients with bone metastases.                                              | feasibility/pilot study                                     | ergometer cycling, 3 times a week. 30 min at the beginning to 50 min after 2 weeks.                   | 1 year         | three cytotoxic agents and pamidronate and radiotherapy | [18] |
| experimental |           | 49 females           | breast                         | bone metastasis - 67%                                   | assess physical activity preferences before and after a 6-month intervention to investigate demographic and clinical correlates of these preferences | single arm trial                                            | 150 min per week of moderate-to-vigorous physical activity, including 30-min walking sessions per day | 6 months       | hormone therapy, chemotherapy                           | [19] |
| experimental | 9 months  | 12 males and females | breast, prostate, lungs, colon | bone metastasis                                         | feasibility of using activity trackers (AT) to assess the patient prognosis and the effects of palliative RT                                         | pilot clinical trial                                        | walking                                                                                               | 7 days post RT | radiotherapy                                            | [20] |
| experimental | 12 months | 40 males             | Prostate                       | metastasis, over 80% with more than one bone metastasis | acceptability, safety and preliminary efficacy of webbased exercise intervention ExerciseGuide                                                       | pilot, randomised, two armed, controlled                    | erobic, resistance-based and flexibility exercise prescription based on info provided by patients     | 8 weeks        | radiotherapy, chemotherapy, hormone therapy             | [21] |
| experimental |           | 48 males and females | various                        | secondary bone cancer                                   | determine the risk of PF following physical rehabilitation in people with secondary bone cancer                                                      | Single-group, single-centered interventional clinical trial | aerobic, anaerobic, and flexibility training                                                          | 8 months       | NA                                                      | [22] |

|              |           |                       |                             |                                                                                            |                                                                                                                                                                                                                                                                                                                                                                                                           |                                                      |                                                                                                    |          |                                          |      |
|--------------|-----------|-----------------------|-----------------------------|--------------------------------------------------------------------------------------------|-----------------------------------------------------------------------------------------------------------------------------------------------------------------------------------------------------------------------------------------------------------------------------------------------------------------------------------------------------------------------------------------------------------|------------------------------------------------------|----------------------------------------------------------------------------------------------------|----------|------------------------------------------|------|
| experimental | 3 years   | 55 males              | prostate                    | bone metastasis                                                                            | the association between physical activity levels and physical and mental health outcomes in prostate cancer patients with bone metastases                                                                                                                                                                                                                                                                 | Cross sectional intervention, randomised             | various                                                                                            | 3 months | radiation, chemotherapy, hormone therapy | [23] |
| experimental |           | 100 males             | prostate                    | locally advanced or metastatic                                                             | evaluate the effect of a lifestyle intervention on disease-specific QoL, diastolic blood pressure, and cancer-related fatigue in sedentary men receiving longterm ADT for advanced prostate cancer                                                                                                                                                                                                        | randomised, controlled, two armed single blind trial | aerobic and resistance exercise with parallel dietary advice                                       | 12 weeks | ADT                                      | [24] |
| experimental | 3.5 years | 516 males and females | solid or hematologic cancer | stage IIIC or IV                                                                           | determine whether collaborative tele-rehabilitation and pharmacological pain management improve function, lessen pain, and reduce requirements for inpatient care.                                                                                                                                                                                                                                        | 3-arm randomized clinical trial                      | walking, resistive exercise program, pharmacological intervention                                  | 6 months | NA                                       | [25] |
| experimental | 10 months | 37 males              | prostate                    | various including bone metastasis (37.5% for exercise group; 36.8% for non exercise group) | the effect of resistance training on body composition and metabolic syndrome MetS changes in prostate cancer patients on ADT; the effect of exercise on sarcopenia prevalence, body fat, strength, physical function, quality of life, and cardiometabolic markers, including insulin, insulin resistance, and the MetS components of blood pressure, central adiposity, triglycerides, glucose and HDL-C | 4 armed randomised, explorative                      | re-sistance training                                                                               | 12 weeks | ADT                                      | [26] |
|              |           |                       |                             |                                                                                            |                                                                                                                                                                                                                                                                                                                                                                                                           |                                                      | aerobic trainign or stretching, treadmill walking sessions delivered thrice weekly between 55% and |          |                                          |      |

|              |           |                      |                                                            |                     |                                                                                                                                                                                                                                                                                                                                                                                                                |                                |                                                                                                                                                                                                    |          |                                      |      |  |
|--------------|-----------|----------------------|------------------------------------------------------------|---------------------|----------------------------------------------------------------------------------------------------------------------------------------------------------------------------------------------------------------------------------------------------------------------------------------------------------------------------------------------------------------------------------------------------------------|--------------------------------|----------------------------------------------------------------------------------------------------------------------------------------------------------------------------------------------------|----------|--------------------------------------|------|--|
|              |           |                      |                                                            |                     |                                                                                                                                                                                                                                                                                                                                                                                                                |                                |                                                                                                                                                                                                    |          |                                      | [27] |  |
| experimental |           | 65 females           | breast                                                     | Stage IV metastatic | determined the feasibility and safety of aerobic training in metastatic breast cancer, explore the effects on symptom control outcomes and to identify a subgroup of patients for whom aerobic training was feasible                                                                                                                                                                                           | randomized 2 armed             | 80% of peak oxygen consumption (VO <sub>2</sub> peak) for 12 consecutive weeks. Stretching was matched to aerobic training with respect to location, frequency, duration, and intervention length. | 12 weeks | chemotherapy                         |      |  |
|              |           |                      |                                                            |                     |                                                                                                                                                                                                                                                                                                                                                                                                                |                                |                                                                                                                                                                                                    |          |                                      |      |  |
| experimental | 2.5 years | 46 males and females | non-small cell lung cancer or inoperable pancreatic cancer | stage III/IV        | examine the feasibility and safety of a multimodal intervention (n-3 polyunsaturated fatty acid nutritional supplements, exercise, and anti-inflammatory medication: celecoxib) for cancer cachexia in patients with incurable lung or pancreatic cancer, undergoing chemotherapy; exploratory to inform future trial design, should the primary endpoints be positive and future trials be deemed worthwhile. | Phase 2, randomized, two armed | aerobic and resistance                                                                                                                                                                             | 6 weeks  | surgery, chemotherapy, radiotherapy, | [28] |  |

|              |           |             |                                                                     |                                                                                         |                                                                                                                                                                                                                                                                             |                                        |                                                                                                                                                                                                      |                                            |     |      |
|--------------|-----------|-------------|---------------------------------------------------------------------|-----------------------------------------------------------------------------------------|-----------------------------------------------------------------------------------------------------------------------------------------------------------------------------------------------------------------------------------------------------------------------------|----------------------------------------|------------------------------------------------------------------------------------------------------------------------------------------------------------------------------------------------------|--------------------------------------------|-----|------|
| experimental | 2.5 years | and females | metastatic or locally advanced tumors of the gastrointestinal, lung | Stage IV metastatic or locally advanced                                                 | test the effects of a combined nutrition and physical exercise program on cancer patients with metastatic or locally advanced tumors of the gastrointestinal and lung tracts                                                                                                | two armed, randomized controlled trial | 60-min exercise program twice a week: warm-up exercises, strength and balance training exercises                                                                                                     | 3 months                                   | NA  | [29] |
| experimental | NA        | 57 males    | Prostate                                                            | advanced or locally advanced Pca, bone metastasis 24.1% in EX group, 15.4% in CON group | effects of 12 weeks football training on the LBM (primary outcome), body fat percentage, maximal oxygen uptake (VO2max), muscle strength, and sit-to-stand performance                                                                                                      | two armed, randomized controlled trial | football practice, 2-3 times a week                                                                                                                                                                  | 12 weeks                                   | ADT | [30] |
| experimental | 2 years   | 46 males    | prostate                                                            | locally advanced or advanced stage, 43% in EX group, 26% in CON group                   | the effects of 12 weeks of unsupervised home-based 'exergaming' (i.e., technology-driven exercise) compared to usual care on physical function, body composition, quality of life (QoL), and fatigue in patients with prostate cancer on androgen-deprivation therapy (ADT) | two armed, randomized controlled trial | 90 min individual before the home-based exergaming with the Xbox 360 Kinect system, aerobic and strength exercise for 1 h, including a warm-up and cool-down period, three-times a week for 12 weeks | 12 weeks                                   | ADT | [31] |
|              | 2 years   |             | various                                                             |                                                                                         | to evaluate the safety/feasibility of IPMT and secondarily assess pain, bone density,                                                                                                                                                                                       | exploratory, non-blinded,              | once daily, starting on the first day of palliative RT and continuing for the entire RT period, 15                                                                                                   | duration of RT and then 3 times a week for |     | [32] |

| experi-<br>mental                                                                                                                                                                                       |                                                                             | 60 males<br>and fe-<br>males                                    | renal cell, locally ad-<br>vanced or<br>gastroin-<br>testinal, metastatic,<br>pancre-<br>atic, liver<br>30% bone<br>mets | Bone me-<br>tastasis                   | pathologic fracture<br>rate, and QOL                                                                                                                                                    | randomized<br>controlled trial                                                                                                                                                                                                                                                                                                              | min per<br>day and<br>consisted<br>of iso-<br>metric<br>exercises            | another 3<br>months | radio-<br>therapy               |     |
|---------------------------------------------------------------------------------------------------------------------------------------------------------------------------------------------------------|-----------------------------------------------------------------------------|-----------------------------------------------------------------|--------------------------------------------------------------------------------------------------------------------------|----------------------------------------|-----------------------------------------------------------------------------------------------------------------------------------------------------------------------------------------|---------------------------------------------------------------------------------------------------------------------------------------------------------------------------------------------------------------------------------------------------------------------------------------------------------------------------------------------|------------------------------------------------------------------------------|---------------------|---------------------------------|-----|
| experi-<br>mental                                                                                                                                                                                       | 34<br>months                                                                | 20 males<br>and fe-<br>males                                    |                                                                                                                          |                                        | feasibility and de-<br>scribing effects of<br>a supportive 12-<br>week progressive<br>resistance training<br>program in ad-<br>vanced cancer pa-<br>tients<br>undergoing TKI<br>therapy | non-random-<br>ized con-<br>trolled clinical<br>exercise inter-<br>vention trial                                                                                                                                                                                                                                                            | machine-<br>based<br>re-<br>sistance<br>training,<br>2x/week                 | 12 weeks            | Tyrosine<br>kinase<br>inhibitor | [8] |
| Outcome<br>measures                                                                                                                                                                                     | Compliance                                                                  | Adherence<br>to pro-<br>gram                                    | In-person<br>or Remote<br>based                                                                                          | Supervision                            | Assisted<br>training<br>technology                                                                                                                                                      | Main results                                                                                                                                                                                                                                                                                                                                | Positive asso-<br>ciation exer-<br>cise with re-<br>duced frac-<br>ture risk | Reference           |                                 |     |
| body composi-<br>tion, QoL,<br>cardiorespiratory,<br>max lower body<br>strength                                                                                                                         | 70%                                                                         | 80.7% for<br>walking and<br>85.3% for<br>resistance<br>training | home-<br>based/re-<br>mote based                                                                                         | unsupervised                           | resistance<br>bands of 4<br>different<br>elastic ten-<br>sion, activity<br>tracker<br>(Garmin vi-<br>vosmart)                                                                           | feasible for men<br>with prostate can-<br>cer, cardiorespira-<br>tory and max<br>lower body<br>strength increased                                                                                                                                                                                                                           | Not men-<br>tioned                                                           | [9]                 |                                 |     |
| Functional mo-<br>bility (SPPB);<br>self-reported<br>pain and fatigue.                                                                                                                                  | 78.8% (67.7%<br>in<br>resistance arm;<br>90.6% in<br>cardiovascular<br>arm) | not men-<br>tioned                                              | in-person                                                                                                                | monitored by<br>trained person-<br>nel | not men-<br>tioned                                                                                                                                                                      | significant increase<br>in SPPB total<br>score (P<.001), in-<br>crease in gait<br>speed (P=.001),<br>and reduction in<br>fatigue (P=.05).<br>cardio exercise<br>participants -<br>small improve-<br>ment in SPPB to-<br>tal score than RT<br>participants<br>(F1,49=4.21,<br>P=.045),<br>the difference was<br>not confirmed                | Not men-<br>tioned                                                           | [10]                |                                 |     |
| safety and toler-<br>ance of the exer-<br>cise program,<br>physical func-<br>tion, physical<br>activity level,<br>body composi-<br>tion, fatigue,<br>quality of life<br>and psychologi-<br>cal distress | 93%                                                                         | 83%                                                             | in-person                                                                                                                | monitored by<br>trained person-<br>nel | Neurocom<br>Smart Bal-<br>ancemaster<br>for bal-<br>ance, tri-<br>axial accel-<br>erometer ac-<br>tivity moni-<br>tor for phys-<br>ical activity<br>level                               | No AE or SRE oc-<br>curred<br>during the super-<br>vised exercise ses-<br>sions.<br>Program well tol-<br>erated, high at-<br>tendance (83%)<br>and compliance<br>rates (93%), par-<br>ticipants exercise<br>at an intensity<br>within the target<br>range<br>perceived ~exer-<br>tion<br>=13.8±1.5). muscle<br>strength 11%~;<br>submaximal | not clear                                                                    | [11]                |                                 |     |



|                                                                                                   |                                                                                                           |                                                                                                                                  |                                 |                                                                                     |                                                                                                            |                                                                                                                                                                                                                                                                                                                                                                                             |           |                                                                                                                                                                                                                                                                                                                                                                                |
|---------------------------------------------------------------------------------------------------|-----------------------------------------------------------------------------------------------------------|----------------------------------------------------------------------------------------------------------------------------------|---------------------------------|-------------------------------------------------------------------------------------|------------------------------------------------------------------------------------------------------------|---------------------------------------------------------------------------------------------------------------------------------------------------------------------------------------------------------------------------------------------------------------------------------------------------------------------------------------------------------------------------------------------|-----------|--------------------------------------------------------------------------------------------------------------------------------------------------------------------------------------------------------------------------------------------------------------------------------------------------------------------------------------------------------------------------------|
|                                                                                                   |                                                                                                           |                                                                                                                                  |                                 |                                                                                     |                                                                                                            |                                                                                                                                                                                                                                                                                                                                                                                             |           | <p>aerobic exercise capacity 5% and ambulation 12%), physical activity level ( 24%) and lean mass ( 3%) differed significantly between groups following the intervention, with favorable changes in the exercise group compared with the usual care group. No significant between- group differences were observed for fatigue, quality of life or psychological distress.</p> |
| feasibility & safety, preliminary efficacy, fatigue, QoL, physical performance, physical activity | 100%                                                                                                      | Adherence to the resistance and walking components of the program was 100% and 25%, and 71% adhered to the intensity of walking. | home-based/remote-based         | mixed: supervised resistance training by trained personnel and unsupervised walking | portable bar and resistance bands, weights, pedometers, dynamometer, physical activity monitor (Actiheart) | feasible and safe. The dose of the resistance training component was well tolerated and achievable in this population                                                                                                                                                                                                                                                                       | not clear | [12]                                                                                                                                                                                                                                                                                                                                                                           |
| QoL, fatigue, and emotional distress.                                                             | Treatment group 83.3% for 12 weeks, 60% for 24 weeks; control group 73% for 12 weeks and 60% for 24 weeks | not mentioned                                                                                                                    | mixed: in-person and home based | mixed: first with trained personnel for 2 weeks then home based for 6 months        | not mentioned                                                                                              | Psychosocial aspects in resistance training group were significantly improved after three (p = 0.001); and six months (p = 0.010). Painful site and pain characteristics were without significant differences. Functional interference (p = 0.081). physical fatigue (p = 0.013), and interference with daily life (p = 0.006) . Emotional distress was lower after six months (p = 0.016). | not clear | [33]                                                                                                                                                                                                                                                                                                                                                                           |
| bone density involved metastatic bone during radiation therapy, quantify                          | 100%                                                                                                      | not mentioned                                                                                                                    | mixed: in-person and home based | mixed: first with trained personnel for 2 weeks then home based for 6 months        | not mentioned                                                                                              | Bone density increased by 28.3% (IQR 11.4–139.0) and 80.3% (IQR                                                                                                                                                                                                                                                                                                                             | yes       | [33]                                                                                                                                                                                                                                                                                                                                                                           |

|                                                                                                                                                                                                       |                                            |                                                                                       |           |                                |               |  |                                                                                                                                                                                                                                                                                                                                                                                                                                                           |               |      |
|-------------------------------------------------------------------------------------------------------------------------------------------------------------------------------------------------------|--------------------------------------------|---------------------------------------------------------------------------------------|-----------|--------------------------------|---------------|--|-----------------------------------------------------------------------------------------------------------------------------------------------------------------------------------------------------------------------------------------------------------------------------------------------------------------------------------------------------------------------------------------------------------------------------------------------------------|---------------|------|
| pathological fractures                                                                                                                                                                                |                                            |                                                                                       |           |                                |               |  | 32.6–250.6) after 3 and 6 months INT (both $p < 0.01$ ). compared to CT after 3 and 6 months (both $p < 0.01$ , median 59.7; IQR 21.1–98.3 median 62.9; IQR 9.7 to 161.7). control group . 23.3% of the patients in the treated group and 30.0% of the patients in control group had pathological fractures, no fracture was assigned to intervention, and no difference between groups after 3 and 6 months was observed ( $p = 0.592$ and $p = 0.604$ ) |               |      |
| QoL, and secondary outcomes: continuation of football after 6 months, hip and lumbar spine BMD, mental health score, fat lean body mass, safety outcomes ie, fractures, falls and hospital admissions | 95% at 6 months, 92% at 1 year             | 59% chose to continue after completion of intervention and 78% attended more than 50% | in-person | self supervision               | not mentioned |  | no difference in QoL, improved mental health & hip BMD, less fat mass INT, no difference in self-reported physical activity behaviour, higher hospital admissions in controlled group, no difference in fractures.                                                                                                                                                                                                                                        | yes           | [13] |
| feasibility, expressed as training attendance rate and training-related adverse events                                                                                                                | 90% for treatment group; 80% control group | around 50% could not do 2 out of 4 exercises                                          | in-person | monitored by trained personnel | not mentioned |  | Attendance metrics high, high acceptance of the training program. frequent deviations from the training prescription: modified due to pain, immobility or weakness.                                                                                                                                                                                                                                                                                       | not clear     | [14] |
| physical function subscale patient-rated, physical function by up & go test, dynamic muscle strength, balance, whole body lean and fat mass, fatigue, prostate specific antigen, safety of program    | 89%                                        | not mentioned                                                                         | in-person | monitored by trained personnel | not mentioned |  | no difference for self-reported physical function ( $P = 0.682$ ) at baseline. After 3 months, significant difference in physical function EX (3.2 points; 95% CI, 0.4–6.0 points; $P = 0.028$ ). no difference in                                                                                                                                                                                                                                        | no fractures. | [15] |

|                                                                                                                                 |     |                                                                                                         |                                                               |                 |                                                                                                                                                                                                                                                                                                                         |               |      |
|---------------------------------------------------------------------------------------------------------------------------------|-----|---------------------------------------------------------------------------------------------------------|---------------------------------------------------------------|-----------------|-------------------------------------------------------------------------------------------------------------------------------------------------------------------------------------------------------------------------------------------------------------------------------------------------------------------------|---------------|------|
|                                                                                                                                 |     |                                                                                                         |                                                               |                 | baseline for leg extension muscle strength, physical function, body composition or fatigue. after 3 months, treatment group has improved leg extension. No change in fatigue, physical function, balance, lean mass or total body fat mass. No adverse events of skeletal fractures                                     |               |      |
|                                                                                                                                 | 75% | homebased, many patients lived out of state, telephone contact to determine if modifications are needed | self supervision after initial test for exercise prescription | stretch bands   | all 14 patients in INT improved in : lean body weight, muscle strength, fewer minutes on treadmill, decrease in fatigue, mood disturbance, increase night sleep, decrease daytime sleepiness, and the test results of all 10 patients in the usual-care group declined.                                                 | yes, no SREs. | [16] |
| Safety and tolerability of exercise, Physical function and physical activity levels, Body composition. Patient reported outcome | 85% | in person                                                                                               | the supervision of an accredited exercise physiologist        |                 | 14 participants completed the follow-up . improvements in physical function (4–6 %), physical activity levels (~160 min/week), lean mass (3–4 %), and QoL(5–7 %). 6-month , improvements in ambulation (4 %), physical activity level (~105 min/week), whole body lean mass (2 %), and quality of life (13 %) remained. | yes, no SREs. | [17] |
| HR, respiratory quotient, O2 uptake, peak work capacity, QoL, patient reported outcome                                          | NA  | in person                                                                                               | Supervised                                                    | cycling machine | Feasibility, safety and beneficial effects of the program were proven for the patient in this case study. VO 2max (20.2% after 16 weeks, 52.7% after 12 months) and peak work capacity (15.5% after 16 weeks, 35.7% after 12 months)                                                                                    | yes, no SREs. | [18] |

---

had increased.  
marked improve-  
ment in physical  
performance and  
in quality of life.

---

|                                                                                                                                                                                       |                                                                                                                                                             |                                                             |                         |              |                  |                                                                                                                                                                                                                                                                                                                       |              |      |
|---------------------------------------------------------------------------------------------------------------------------------------------------------------------------------------|-------------------------------------------------------------------------------------------------------------------------------------------------------------|-------------------------------------------------------------|-------------------------|--------------|------------------|-----------------------------------------------------------------------------------------------------------------------------------------------------------------------------------------------------------------------------------------------------------------------------------------------------------------------|--------------|------|
| Physical activity preferences                                                                                                                                                         | 89%                                                                                                                                                         |                                                             | remote based/home based | unsupervised | activity tracker | More participants preferred community fitness centre (66%) rather than at home (19% vs. 44% at baseline, $p = .03$ ). A higher social vulnerability score and no chemotherapy at baseline significantly associated with lower desire to receive physical activity counseling ( $p = .01$ and $p = .04$ respectively). | NA           | [19] |
| QoL, pain,                                                                                                                                                                            | NA                                                                                                                                                          |                                                             | remote/home based       | unsupervised | activity tracker | No correlation between improvements in QoL or level of pain with number of daily steps. Patients who took more than 7800 steps per day prior to radiotherapy lived significantly longer                                                                                                                               | NA           | [20] |
| acceptability, safety, efficacy, patient reported outcomes, trial feasibility                                                                                                         | re-sistance: 64.6 +/- 40.2%; aerobic 62.7%<br>102 +/- 62.7%                                                                                                 | resistance training: 78.3 +/- 77.9%; aerobic 91.5 +/- 56.5% | remote/home based       | unsupervised | Exercise-Guide   | no serious adverse effect, higher moderate to vigorous physical activity, improvement in stepcount, ExerciseGuide is acceptable, safe and efficacious                                                                                                                                                                 | No SREs      | [21] |
| safety and feasibility of an outpatient rehabilitation program for patients with SBC; Short Form Health Survey (SF-36) and numeric rating scale (NRS) scores to assess pain intensity | 58%                                                                                                                                                         | NA                                                          | in person               | supervised   | NA               | One PF was detected, outside of rehabilitation therapy. Two other SREs occurred, a total event rate of 11.8/ 10 000 hours of exposure. significant improvement in NRS (95% CI, 1.41-3.08, $P < .001$ ) and SF-36 measures (95% CI, 80.35-158.11, $P < .001$ )                                                         | No fractures | [22] |
| physical activity, QoL, physical performance, , body size/ composition and prostate-specific antigen                                                                                  | 58% moderate and vigorous exercise; only 29% met the current aerobic exercise for cancer survivors (>150 mins of moderate intensity or >75 mins of vigorous | 29%                                                         | remote based            | unsupervised | NA               | 16 (29%) met aerobic exercise guidelines, 39 (71%) lower aerobic exercise levels- lower physical functioning ( $p = .004$ ), role functioning (physical and emotional) ( $p <$                                                                                                                                        | NA           | [23] |

|                                                                                                                                                                                                                     |                                                                                         |                                                                                                      |                                  |                                                                                                                                                       |                                                                                                                   |                                                                                                                                                                                                                                                                                                                                                                                                                                                                                                                                                                                                                                               |  |  |    |      |
|---------------------------------------------------------------------------------------------------------------------------------------------------------------------------------------------------------------------|-----------------------------------------------------------------------------------------|------------------------------------------------------------------------------------------------------|----------------------------------|-------------------------------------------------------------------------------------------------------------------------------------------------------|-------------------------------------------------------------------------------------------------------------------|-----------------------------------------------------------------------------------------------------------------------------------------------------------------------------------------------------------------------------------------------------------------------------------------------------------------------------------------------------------------------------------------------------------------------------------------------------------------------------------------------------------------------------------------------------------------------------------------------------------------------------------------------|--|--|----|------|
| intensity per week)                                                                                                                                                                                                 |                                                                                         |                                                                                                      |                                  |                                                                                                                                                       | .05), general health scores (p = .014) , lower physical performance (p < .05), reduced physical and mental health |                                                                                                                                                                                                                                                                                                                                                                                                                                                                                                                                                                                                                                               |  |  |    |      |
| Exercise behaviour, adherence to the intervention, and biochemical safety; health-related outcomes, dietary outcomes                                                                                                | 85% of the cohort completing 12-wk follow-up and 68% of men attending follow-up at 6 mo | 94% for the supervised and 82% of the prescribed independent exercise sessions over the first 12 wk. | mixed: in-person and home based. | Supervision twice a week from weeks 1-6; once week 7-12; first 6 weeks, at least once a week self directed, increasing to twice a week from week 7-12 | NA                                                                                                                | Clinically relevant improvements in FACT- P were seen at 12 wk in the INT compared with CT (mean difference: 8.9 points; 95% confidence interval [CI], 3.7–14.2; adjusted p = 0.001). No difference was apparent at 6 mo (mean difference: 3.3 points; 95% CI, 2.6 to 9.3; adjusted p = 0.27). No difference in diastolic blood pressure was seen at either follow-up (all p > 0.05). Clinically relevant improvements in FACT-F were seen at 12 wk (mean difference: 5.3 points; 95% CI, 2.7–7.9; adjusted p < 0.001) and maintained following withdrawal of supervision (mean difference: 3.9 points; 95% CI, 1.1–6.8; adjusted p = 0.007). |  |  | NA | [24] |
|                                                                                                                                                                                                                     |                                                                                         |                                                                                                      |                                  |                                                                                                                                                       |                                                                                                                   |                                                                                                                                                                                                                                                                                                                                                                                                                                                                                                                                                                                                                                               |  |  |    |      |
| Blinded assessment of function using the Activity Measure for Postacute Care computer adaptive test, pain interference and average intensity using the Brief Pain Inventory, and quality of life using the EQ-5D-3L | 97.5% at month 3 and 97.4% at month 6 and were similar across the arms                  | NA                                                                                                   | home based                       | automated monitoring, telephone consultation with qualified PT                                                                                        | pedometer, elastic bands, supported documents                                                                     | Compared with CT, the telerehabilitation arm 2 had improved function (difference, 1.3; 95% CI, 0.08-2.35; P = .03) and QoL (difference, 0.04; 95% CI, 0.004-0.071; P = .01), while both telerehabilitation arms 2 and 3 had reduced pain interference (arm 2, −0.4; 95% CI, −0.78 to                                                                                                                                                                                                                                                                                                                                                          |  |  |    | [25] |

---

–0.09;  $P = .01$  and  
arm  
3, –0.4; 95% CI,  
–0.79  
to –0.10;  $P = .01$ ),  
and  
average intensity  
(arm  
2, –0.4; 95% CI,  
–0.78  
to –0.07;  $P = .02$   
and  
arm 3, –0.5; 95%  
CI,  
–0.84 to  
–0.11;  $P = .006$ ).  
Telerehabilitation  
was associated  
with higher odds  
of home discharge  
in arms 2 (odds ra-  
tio [OR], 4.3; 95%  
CI, 1.3-  
14.3;  $P = .02$ ) and  
3  
(OR, 3.8; 95% CI,  
1.1-  
12.4;  $P = .03$ ) and  
fewer

---

|                                                                                                                                                                                                                                                              |                                                                                                                                                                                                                                                                                                                                                      |                                                                           |                                                                                      |                       |                                                                                                                                                                                                                                                                                                                                                                                                                                                                                                                                                          |         |      |
|--------------------------------------------------------------------------------------------------------------------------------------------------------------------------------------------------------------------------------------------------------------|------------------------------------------------------------------------------------------------------------------------------------------------------------------------------------------------------------------------------------------------------------------------------------------------------------------------------------------------------|---------------------------------------------------------------------------|--------------------------------------------------------------------------------------|-----------------------|----------------------------------------------------------------------------------------------------------------------------------------------------------------------------------------------------------------------------------------------------------------------------------------------------------------------------------------------------------------------------------------------------------------------------------------------------------------------------------------------------------------------------------------------------------|---------|------|
| body composition, metabolic syndrome, QoL, physical fitness, muscle strength                                                                                                                                                                                 | <p>Exercise group: 93.8 ± 2.0% with 77% of TRAIN and TRAINPRO participants completing all 36 sessions; Protein adherence: TRAINPRO and PRO groups was 72.0 ± 22.8%, with 120.9 ± 58.1 doses of 168 total ingested; Adherence to the home-based flexibility program in PRO and STRETCH was 79.0 ± 4.1%, with 28.4 ± 10.4 of 36 sessions completed</p> | 88.3 ± 16.0%                                                              | Exercise group: supervised exercise 3 days per week for 12 weeks; control; homebased | Exercise: supervised, | <p>32 participated in the intervention (EXE n = 13; No-EXE n = 19). At baseline, 43.8% of participants were sarcopenic and 40.6% met the criteria for MetS. Post- intervention, EXE significantly improved lean mass (d = 0.9), sarcopenia prevalence (d = 0.8), body fat % (d = 1.1), strength (d = 0.8–3.0), and prostate cancer-specific quality of life (d = 0.9) compared to NoEXE (p &lt; 0.05). No significant differences were observed between groups for physical function or MetS-related variables except waist circumference (d = 0.8).</p> | No SREs | [26] |
| <p>aerobic training feasibility, which was a priori defined as the lost to follow- up (LTF) rate (&lt; 20%) and attendance (70%). Secondary end- points were safety, objective outcomes (VO2 peak and functional capacity, patient reported outcomes QoL</p> | 63% ±30%.                                                                                                                                                                                                                                                                                                                                            | 49%                                                                       | in person                                                                            | supervised            | <p>mean attendance rate was 63% ± 30%. permanent discontinuation and dose modification were 27% and 49%. improvements in PROs,favored the attention control group (P values &gt; .05). 14 of 33 patients (42%) aerobic training had acceptable tolerability (relative dose intensity70%), improvements in VO2peak and functional capacity (P values&lt; .05).</p>                                                                                                                                                                                        | No SREs | [27] |
|                                                                                                                                                                                                                                                              |                                                                                                                                                                                                                                                                                                                                                      | three patients had >80% compliance to all components of the intervention. |                                                                                      |                       |                                                                                                                                                                                                                                                                                                                                                                                                                                                                                                                                                          |         |      |



|                                                                                                                                                                                                                                                                                                                                                                                                                                |                                                                                                                                                                                                                                    |                                                                                                                                                                                                                                                       |                                                                                                                    |                                                                |                                                                                                                                                                                                                                                                                                                                                                                           |         |      |
|--------------------------------------------------------------------------------------------------------------------------------------------------------------------------------------------------------------------------------------------------------------------------------------------------------------------------------------------------------------------------------------------------------------------------------|------------------------------------------------------------------------------------------------------------------------------------------------------------------------------------------------------------------------------------|-------------------------------------------------------------------------------------------------------------------------------------------------------------------------------------------------------------------------------------------------------|--------------------------------------------------------------------------------------------------------------------|----------------------------------------------------------------|-------------------------------------------------------------------------------------------------------------------------------------------------------------------------------------------------------------------------------------------------------------------------------------------------------------------------------------------------------------------------------------------|---------|------|
| feasibility and safety of a multimodal intervention (n=30) polyunsaturated fatty acid nutritional supplements, exercise, and anti-inflammatory medication; Weight, muscle mass, physical activity (ActivPAL and 6MWT), grip strength, nutritional status (aPG-SGA and AveS scores), and fatigue score                                                                                                                          | Compliance (deemed as >50% of individual components of patients) was 76% (19/25) for celecoxib, 60% (15/25) for exercise components and 48% (12/25) for the ONS. Therefore, acceptable compliance was achieved in all but the ONS. | In terms of combinations, eight (38%) patients did >80% of the aerobic and resistance components. Nine (43%) patients took >80% of the ONS and celecoxib components and nine (43%) patients took/did >80% of the resistance and celecoxib components. | unsupervised, contacted once a week to assess compliance and to encourage adherence to the multimodal intervention | weights                                                        | Compliance to the individual components of the intervention was 76% for celecoxib, 60% for exercise, and 48% for nutritional supplements. no statistically significant effect on physical activity or muscle mass. no intervention-related SAE and survival was similar between the groups.                                                                                               | No SREs | [28] |
| Quality of life (European Organization for Research and Treatment of Cancer Quality of Life Questionnaire version 3.0), physical performance (hand-grip strength, 6-min walk test, timed sit-to-stand test and 1 repetition maximum leg press), nutritional status (body weight, bioelectrical impedance analysis), dietary intake (three-day dietary record) and clinical data (unexpected hospital days, performance status) | 75%                                                                                                                                                                                                                                | NA                                                                                                                                                                                                                                                    | in person supervised by qualified professionals                                                                    | cycling ergometer, machines for strength training, balance mat | Median adherence to exercise program 75%. The median number of counselling sessions was 3.0 (range 0–7 sessions). Post intervention, no difference in global health status/ QoL. Intervention was superior to UC regarding nausea and vomiting (p = 0.023) and protein intake (p = 0.01). No statistical differences were for energy intake, nutritional status and physical performance. | No SREs | [29] |
|                                                                                                                                                                                                                                                                                                                                                                                                                                |                                                                                                                                                                                                                                    |                                                                                                                                                                                                                                                       |                                                                                                                    |                                                                | Mean heart rate during training was 137.7 (standard deviation 13.7) bpm or 84.6 (3.9)% HRmax. In FG, LBM increased by 0.5 kg [95% (CI)                                                                                                                                                                                                                                                    |         |      |

|                                                                                                                                                                                                                                                                         |        |    |           |                                       |            |                                                                                                                                                                                                                                                                                                                                                                                                                                                                                  |                                                                                                                                                |
|-------------------------------------------------------------------------------------------------------------------------------------------------------------------------------------------------------------------------------------------------------------------------|--------|----|-----------|---------------------------------------|------------|----------------------------------------------------------------------------------------------------------------------------------------------------------------------------------------------------------------------------------------------------------------------------------------------------------------------------------------------------------------------------------------------------------------------------------------------------------------------------------|------------------------------------------------------------------------------------------------------------------------------------------------|
| <p>The primary outcome was change in lean body mass (LBM) assessed by dual-energy X-ray absorptiometry scanning. Secondary outcomes included changes in knee- extensor muscle strength (one repetition maximum), fat percentage, and maximal oxygen uptake (VO2max)</p> | 76.50% | NA | in person | supervised by qualified professionals | HR monitor | <p>0.1–0.9; P = 0.02] with no change in CON (mean group difference 0.7 kg; 95% CI 0.1–1.2; P = 0.02). muscle strength increased in FG (8.9 kg; 95% CI 6.0–11.8; P &lt; 0.001) with no change in CON (mean group difference 6.7 kg; 95% CI 2.8–10.7; P &lt; 0.001). In FG, VO2max increased (1.0 mL/kg/min; 95% CI 0.2–1.9; P = 0.02) and fat percentage tended to decrease (0.7%; 95% CI 1.3–0.0; P = 0.06), but these changes were not significantly different from CON. In</p> | <p>[30]</p> <p>Some SREs: 3 events, no bone metastasis present in the fractured bones -- &gt; accidental, unrelated to metastatic disease.</p> |
|-------------------------------------------------------------------------------------------------------------------------------------------------------------------------------------------------------------------------------------------------------------------------|--------|----|-----------|---------------------------------------|------------|----------------------------------------------------------------------------------------------------------------------------------------------------------------------------------------------------------------------------------------------------------------------------------------------------------------------------------------------------------------------------------------------------------------------------------------------------------------------------------|------------------------------------------------------------------------------------------------------------------------------------------------|

|                                                                                                                                                                                                                                                                                                                                                                                                                                                               |                                                                                                         |           |                                                           |                                        |                                                                                                                                                                                                                                                                                                                                                                                                                                     |                                                                                                                                                                                                                                                                                                                                                                                                                                                                                    |                |             |
|---------------------------------------------------------------------------------------------------------------------------------------------------------------------------------------------------------------------------------------------------------------------------------------------------------------------------------------------------------------------------------------------------------------------------------------------------------------|---------------------------------------------------------------------------------------------------------|-----------|-----------------------------------------------------------|----------------------------------------|-------------------------------------------------------------------------------------------------------------------------------------------------------------------------------------------------------------------------------------------------------------------------------------------------------------------------------------------------------------------------------------------------------------------------------------|------------------------------------------------------------------------------------------------------------------------------------------------------------------------------------------------------------------------------------------------------------------------------------------------------------------------------------------------------------------------------------------------------------------------------------------------------------------------------------|----------------|-------------|
| <p>The primary outcome of the study was 6-min walking test (6MWT). Secondary outcomes were leg extensor power (LEP), body composition (lean- and fat-mass), self-reported physical functioning and global health status (European Organisation for Research and Treatment of Cancer quality of life questionnaire 30-item core [EORTC QLQ-C30]), QoL (Functional Assessment of Cancer Therapy – Prostate [FACT-P]) and fatigue (FACT – fatigue [FACT-F]).</p> | <p>91% of patients completing in the intervention group and 87% in the usual care group</p>             | <p>NA</p> | <p>home based unsupervised</p>                            | <p>Xbox</p>                            | <p>significant improvement in the exergaming group compared to the CT in the primary outcome of 6MWT (mean difference: 21.5 m; 95% confidence interval (ICI) 3.2–39.9; P = 0.023). no differences between the groups for LEP (P = 0.227), lean body mass (P = 0.100), fat body mass (P = 0.092), self-reported physical functioning (P = 0.084) and global health status (P = 0.113), QoL (P = 0.614), and fatigue (P = 0.147).</p> | <p>No SREs</p>                                                                                                                                                                                                                                                                                                                                                                                                                                                                     | <p>[31]</p>    |             |
| <p>feasibility (completion of training programs three months post- RT),pain response (Visual Analog Scale) and opioid consumption, bone density and pathologic fracture rate, and QOL (European Organization for Research and Treatment of Cancer, EORTC questionnaires)</p>                                                                                                                                                                                  | <p>≥80% of the planned sessions were completed by 55% (n = 16/29) in CON and 67% (n = 18/27) in INT</p> | <p>NA</p> | <p>in person during RT then another 3 month homebased</p> | <p>supervised by trained personnel</p> | <p>NA</p>                                                                                                                                                                                                                                                                                                                                                                                                                           | <p>no AE with either training regimen. Altogether, ≥80% of the planned sessions were completed by 55% (n = 16/29) in CON and 67% (n = 18/27) in INT. Regarding the post radiotherapy home- based training, ≥80% of planned sessions were completed by 64% (n = 9/14) of the INT cohort. There were no differences in pain scores, opioid consumption, or bone density between arms (p &gt; 0.05 for all). No difference was observed between groups regarding new pathological</p> | <p>No SREs</p> | <p>[32]</p> |

|                                                                                                                                                                                              |     |         |           |                                       |                                                                                                                                             |                                                                                                                                                                                                                        |             |
|----------------------------------------------------------------------------------------------------------------------------------------------------------------------------------------------|-----|---------|-----------|---------------------------------------|---------------------------------------------------------------------------------------------------------------------------------------------|------------------------------------------------------------------------------------------------------------------------------------------------------------------------------------------------------------------------|-------------|
|                                                                                                                                                                                              |     |         |           |                                       | fractures (INT: n = 1 vs. CON: n = 3) after three months (p = 0.419). There were no QOL differences between arms (all parameters p > 0.05). |                                                                                                                                                                                                                        |             |
| feasibility through evaluating training attendance and completion rate, adverse events, and training progression. training-induced changes in fatigue, QoL, depression, and physical fitness | 81% | unclear | in person | supervised by qualified professionals | exercise machine                                                                                                                            | beneficial effects on muscle strength (RT +11 ± 9 Nm, CON -13 ± 25 Nm, p = 0.005), but not on fatigue (RT +0.3 ± 4.1, CON -1.5 ± 3.0, p = 0.223) or QoL (global QoL score RT -5.6 ± 16.1, CON -2.0 ± 18.2, p = 0.617). | No SREs [8] |

## References

- Rosenberger, F.; Wiskemann, J.; Vallet, S.; Haag, G.M.; Schembri, E.; Jäger, D.; Grulich, C. Resistance Training as Supportive Measure in Advanced Cancer Patients Undergoing TKI Therapy-a Controlled Feasibility Trial. *Support. Care Cancer* **2017**, *25*, 3655–3664. <https://doi.org/10.1007/s00520-017-3788-3>.
- Carver, J.L. Feasibility Study of a Home-Based Exercise Intervention Program for Patients with Metastatic Castration-Resistant Prostate Cancer Receiving Androgen—Deprivation Therapy; The University of North Carolina at Chapel Hill: Ann Arbor, MI, USA, 2018.
- Litterini, A.J.; Fieler, V.K.; Cavanaugh, J.T.; Lee, J.Q. Differential Effects of Cardiovascular and Resistance Exercise on Functional Mobility in Individuals with Advanced Cancer: A Randomized Trial. *Arch. Phys. Med. Rehabil.* **2013**, *94*, 2329–2335. <https://doi.org/10.1016/j.apmr.2013.06.008>.
- Cormie, P.; Newton, R.U.; Spry, N.; Joseph, D.; Taaffe, D.R.; Galvão, D.A. Safety and Efficacy of Resistance Exercise in Prostate Cancer Patients with Bone Metastases. *Prostate Cancer Prostatic Dis.* **2013**, *16*, 328–335. <https://doi.org/10.1038/pcan.2013.22>.
- Yee, J.; Davis, G.M.; Hackett, D.; Beith, J.M.; Wilcken, N.; Currow, D.; Emery, J.; Phillips, J.; Martin, A.; Hui, R.; et al. Physical Activity for Symptom Management in Women With Metastatic Breast Cancer: A Randomized Feasibility Trial on Physical Activity and Breast Metastases. *J. Pain Symptom Manag.* **2019**, *58*, 929–939. <https://doi.org/10.1016/j.jpainsymman.2019.07.022>.
- Bjerre, E.D.; Petersen, T.H.; Jørgensen, A.B.; Johansen, C.; Krstrup, P.; Langdahl, B.; Poulsen, M.H.; Madsen, S.S.; Østergren, P.B.; Borre, M.; et al. Community-Based Football in Men with Prostate Cancer: 1-Year Follow-up on a Pragmatic, Multicentre Randomised Controlled Trial. *PLoS Med.* **2019**, *16*, e1002936. <https://doi.org/10.1371/journal.pmed.1002936>.
- Rosenberger, F.; Sprave, T.; Clauss, D.; Hoffmann, P.; Welzel, T.; Debus, J.; Rief, H.; Wiskemann, J. Spinal Stabilization Exercises for Cancer Patients with Spinal Metastases of High Fracture Risk: Feasibility of the DISPO-II Training Program. *Cancers* **2021**, *13*, 201.
- Galvão, D.A.; Taaffe, D.R.; Spry, N.; Cormie, P.; Joseph, D.; Chambers, S.K.; Chee, R.; Peddle-McIntyre, C.J.; Hart, N.H.; Baumann, F.T.; et al. Exercise Preserves Physical Function in Prostate Cancer Patients with Bone Metastases. *Med. Sci. Sports Exerc.* **2018**, *50*, 393–399. <https://doi.org/10.1249/MSS.0000000000001454>.
- Coleman, E.A.; Hall-Barrow, J.; Coon, S.; Stewart, C.B. Facilitating Exercise Adherence for Patients with Multiple Myeloma. *Clin. J. Oncol. Nurs.* **2003**, *7*, 529–534. <https://doi.org/10.1188/03.CJON.529-534>.
- Cormie, P.; Galvão, D.A.; Spry, N.; Joseph, D.; Taaffe, D.R.; Newton, R.U. Functional Benefits Are Sustained after a Program of Supervised Resistance Exercise in Cancer Patients with Bone Metastases: Longitudinal Results of a Pilot Study. *Support. Care Cancer* **2014**, *22*, 1537–1548. <https://doi.org/10.1007/s00520-013-2103-1>.

- 
18. Crevenna, R.; Schmidinger, M.; Keilani, M.; Nuhr, M.; Fialka-Moser, V.; Zettinig, G.; Quittan, M. Aerobic Exercise for a Patient Suffering from Metastatic Bone Disease. *Support. Care Cancer* **2003**, *11*, 120–122. <https://doi.org/10.1007/s00520-002-0400-1>.
  19. Delrieu, L.; Vallance, J.K.; Morelle, M.; Fervers, B.; Pialoux, V.; Friedenreich, C.; Dufresne, A.; Bachelot, T.; Heudel, P.-E.; Trédan, O.; et al. Physical Activity Preferences before and after Participation in a 6-Month Physical Activity Intervention among Women with Metastatic Breast Cancer. *Eur. J. Cancer Care* **2020**, *29*, e13169. <https://doi.org/10.1111/ecc.13169>.
  20. Dorion, V.; Lambert, L.; Frazzi, A.; Cayer, J.-F.; Wong, P. A Pilot Study in the Use of Activity Trackers for Assessing Response to Palliative Radiotherapy. *Cureus* **2017**, *9*, e1871. <https://doi.org/10.7759/cureus.1871>.
  21. Evans, H.E.L.; Galvão, D.A.; Forbes, C.C.; Girard, D.; Vandelandotte, C.; Newton, R.U.; Vincent, A.D.; Wittert, G.; Kichenadasse, G.; Chambers, S.; et al. Acceptability and Preliminary Efficacy of a Web- and Telephone-Based Personalised Exercise Intervention for Individuals with Metastatic Prostate Cancer: The ExerciseGuide Pilot Randomised Controlled Trial. *Cancers* **2021**, *13*, 5925. <https://doi.org/10.3390/cancers13235925>.
  22. Tabacof, L.; Delgado, A.; Dewil, S.; Reis, F.; Velar, C.M.; Corteline, M.E.D.; Cecatto, R.B.; Putrino, D.; Imamura, M.; Battistella, L.R.; et al. Safety and Feasibility of Outpatient Rehabilitation in Patients With Secondary Bone Cancer: A Preliminary Study. *Rehabil. Oncol.* **2021**, *39*, E42. <https://doi.org/10.1097/01.REO.0000000000000241>.
  23. Zopf, E.M.; Newton, R.U.; Taaffe, D.R.; Spry, N.; Cormie, P.; Joseph, D.; Chambers, S.K.; Baumann, F.T.; Bloch, W.; Galvão, D.A. Associations between Aerobic Exercise Levels and Physical and Mental Health Outcomes in Men with Bone Metastatic Prostate Cancer: A Cross-Sectional Investigation. *Eur. J. Cancer Care* **2017**, *26*, e12575. <https://doi.org/10.1111/ecc.12575>.
  24. Bourke, L.; Gilbert, S.; Hooper, R.; Steed, L.A.; Joshi, M.; Catto, J.W.F.; Saxton, J.M.; Rosario, D.J. Lifestyle Changes for Improving Disease-Specific Quality of Life in Sedentary Men on Long-Term Androgen-Deprivation Therapy for Advanced Prostate Cancer: A Randomised Controlled Trial. *Eur. Urol.* **2014**, *65*, 865–872.
  25. Cheville, A.L.; Moynihan, T.; Herrin, J.; Loprinzi, C.; Kroenke, K. Effect of Collaborative Telerehabilitation on Functional Impairment and Pain Among Patients With Advanced-Stage Cancer: A Randomized Clinical Trial. *JAMA Oncol.* **2019**, *5*, 644–652. <https://doi.org/10.1001/jamaoncol.2019.0011>.
  26. Dawson, J.K.; Dorff, T.B.; Todd Schroeder, E.; Lane, C.J.; Gross, M.E.; Dieli-Conwright, C.M. Impact of Resistance Training on Body Composition and Metabolic Syndrome Variables during Androgen Deprivation Therapy for Prostate Cancer: A Pilot Randomized Controlled Trial. *BMC Cancer* **2018**, *18*, 368. <https://doi.org/10.1186/s12885-018-4306-9>.
  27. Scott, J.M.; Iyengar, N.M.; Nilsen, T.S.; Michalski, M.; Thomas, S.M.; Herndon, J., 2nd; Sasso, J.; Yu, A.; Chandarlapaty, S.; Dang, C.T.; et al. Feasibility, Safety, and Efficacy of Aerobic Training in Pretreated Patients with Metastatic Breast Cancer: A Randomized Controlled Trial. *Cancer* **2018**, *124*, 2552–2560. <https://doi.org/10.1002/cncr.31368>.
  28. Solheim, T.S.; Laird, B.J.A.; Balstad, T.R.; Stene, G.B.; Bye, A.; Johns, N.; Pettersen, C.H.; Fallon, M.; Fayers, P.; Fearon, K.; et al. A Randomized Phase II Feasibility Trial of a Multimodal Intervention for the Management of Cachexia in Lung and Pancreatic Cancer. *J. Cachexia Sarcopenia Muscle* **2017**, *8*, 778–788. <https://doi.org/10.1002/jcsm.12201>.
  29. Uster, A.; Ruehlin, M.; Mey, S.; Gisi, D.; Knols, R.; Imoberdorf, R.; Pless, M.; Ballmer, P.E. Effects of Nutrition and Physical Exercise Intervention in Palliative Cancer Patients: A Randomized Controlled Trial. *Clin. Nutr.* **2018**, *37*, 1202–1209. <https://doi.org/10.1016/j.clnu.2017.05.027>.
  30. Uth, J.; Hornstrup, T.; Schmidt, J.F.; Christensen, J.F.; Frandsen, C.; Christensen, K.B.; Helge, E.W.; Brasso, K.; Rørth, M.; Midtgaard, J.; et al. Football Training Improves Lean Body Mass in Men with Prostate Cancer Undergoing Androgen Deprivation Therapy. *Scand. J. Med. Sci. Sports* **2014**, *24* (Suppl. 1), 105–112. <https://doi.org/10.1111/sms.12260>.
  31. Villumsen, B.R.; Jorgensen, M.G.; Frystyk, J.; Hørdam, B.; Borre, M. Home-Based “exergaming” Was Safe and Significantly Improved 6-Min Walking Distance in Patients with Prostate Cancer: A Single-Blinded Randomised Controlled Trial. *BJU Int.* **2019**, *124*, 600–608. <https://doi.org/10.1111/bju.14782>.
  32. Sprave, T.; Rosenberger, F.; Verma, V.; Förster, R.; Bruckner, T.; Schlampp, I.; Bostel, T.; Welzel, T.; Akbaba, S.; Rackwitz, T.; et al. Paravertebral Muscle Training in Patients with Unstable Spinal Metastases Receiving Palliative Radiotherapy: An Exploratory Randomized Feasibility Trial. *Cancers* **2019**, *11*, 1771. <https://doi.org/10.3390/cancers11111771>.
  33. Rief, H.; Akbar, M.; Keller, M.; Omlor, G.; Welzel, T.; Bruckner, T.; Rieken, S.; Häfner, M.F.; Schlampp, I.; Gioules, A.; et al. Quality of Life and Fatigue of Patients with Spinal Bone Metastases under Combined Treatment with Resistance Training and Radiation Therapy- a Randomized Pilot Trial. *Radiat. Oncol.* **2014**, *9*, 151. <https://doi.org/10.1186/1748-717X-9-151>.
